# Supplementary material for: Template-free synthesis of hierarchically porous NaCoPO4–Co3O4 hollow microspheres and their application as electrocatalysts for glucose
Source: Royal Society of Chemistry journal article supplement (doi:10.1039/c5ce00535c), 2015-01-01
Supplement: c5ce00535c1.pdf [file c5ce00535c1.pdf]

Electronic Supplementary Information (ESI)

Template free synthesis of hierarchically porous  $\text{NaCoPO}_4\text{-Co}_3\text{O}_4$  hollow microspheres and their application in electrocatalysts for glucose

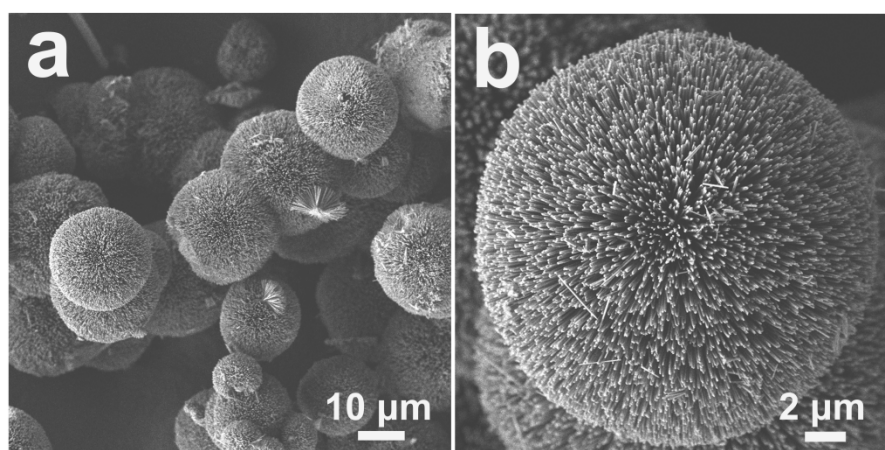

Fig. S1 FESEM images of the sample prepared without adding sodium tartaric.

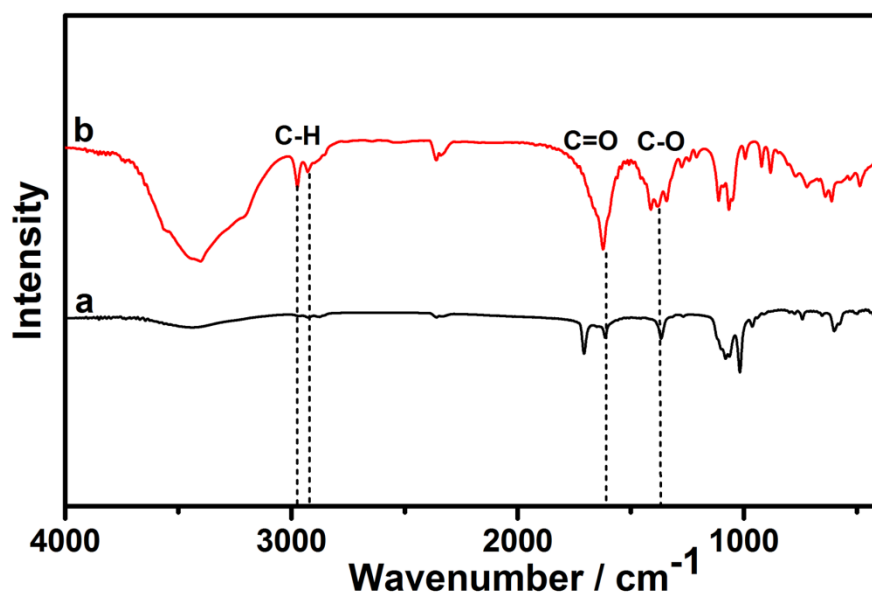

Fig. S2 FTIR spectra of the hierarchically hollow microspheres precursors (a) and sodium tartaric (b).

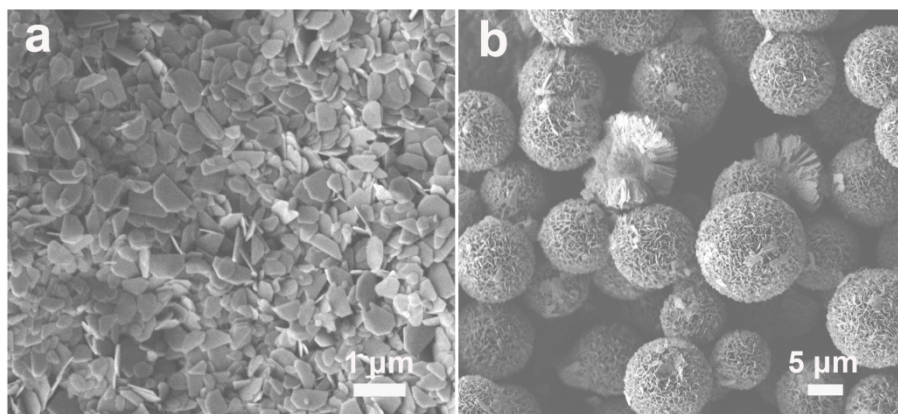

**Fig. S3** SEM images of the samples prepared under different reaction temperature: (a) 160 °C; (b) 220 °C.

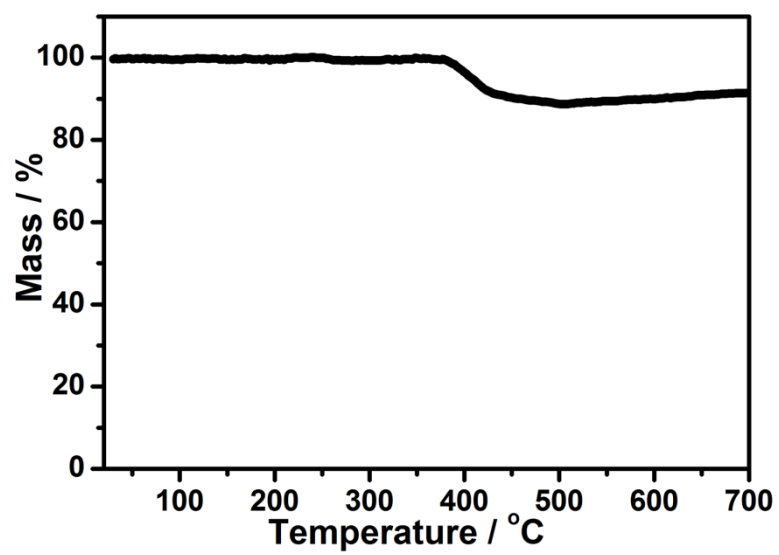

Fig. S4 Thermogravimetric curve of the hierarchically hollow microspheres precursors.

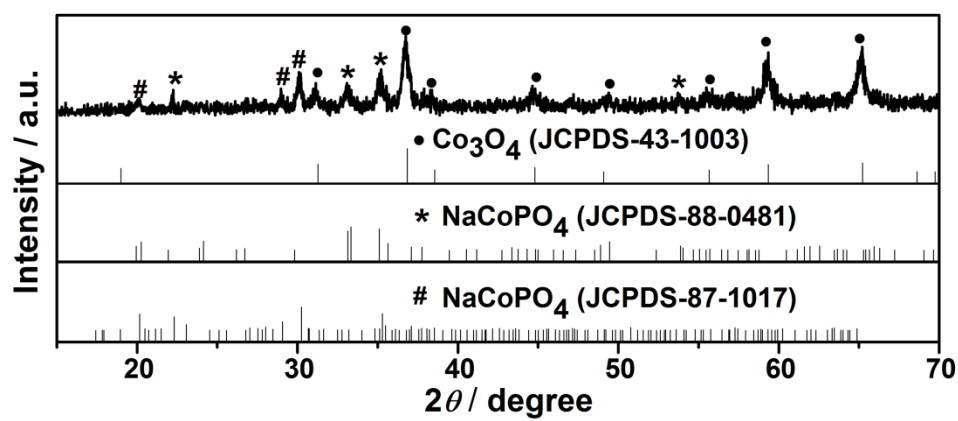

Fig. S5 XRD patterns of the as-prepared  $\text{NaCoPO}_4\text{-Co}_3\text{O}_4$ .

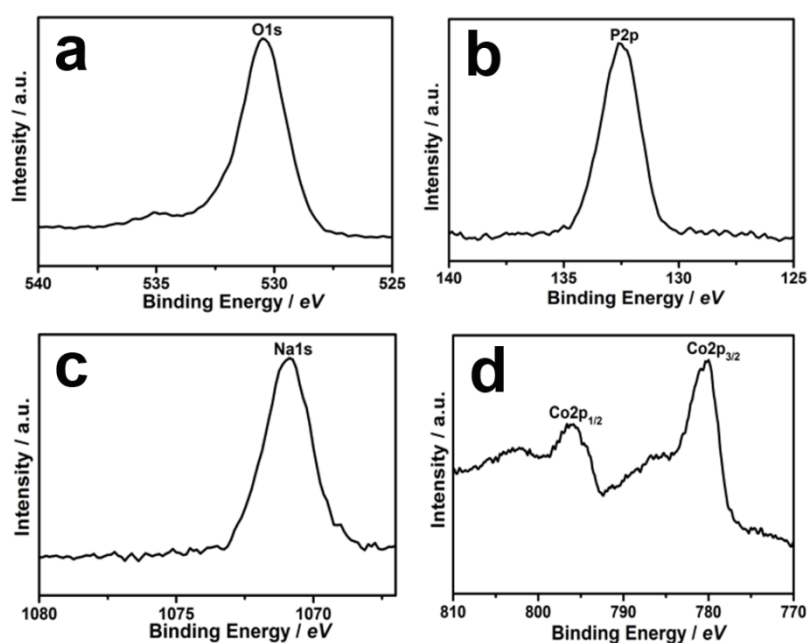

**Fig. S6** X-ray photoelectron spectroscopy (XPS) survey scan spectra of the NaCoPO<sub>4</sub>-Co<sub>3</sub>O<sub>4</sub> composites: (a) O 1s; (b) P 2p; (c) Na 1s; (d) Co 2p.
